# Supplementary material for: Association of Genomic Instability Score, Tumor Mutational Burden, and Tumor-Infiltrating Lymphocytes as Biomarkers in Uterine Serous Carcinoma
Source: MDPI journal article supplement (doi:10.3390/cancers15020528), 2023-01-15
Supplement: s1 [file s1]

Supplementary Materials

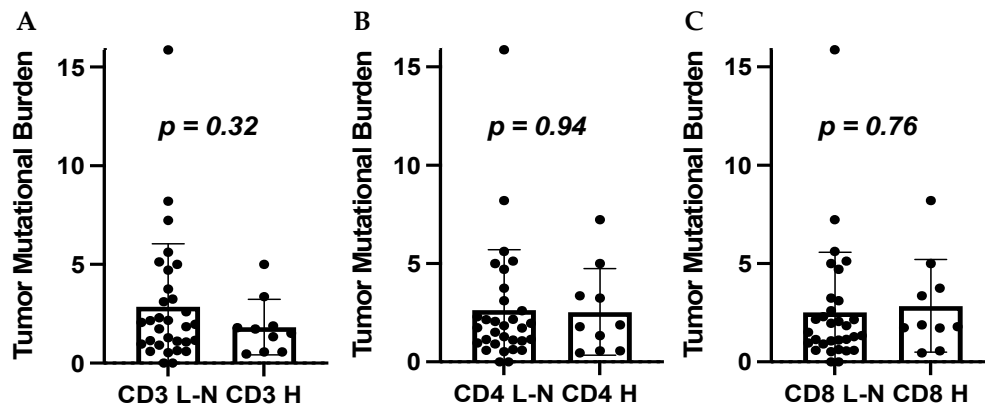

**Figure S1.** Comparison of mean tumor mutational burden score by high (H) and low-normal (L-N) immune cell counts. **A:** CD3, **B:** CD4, **C:** CD8.

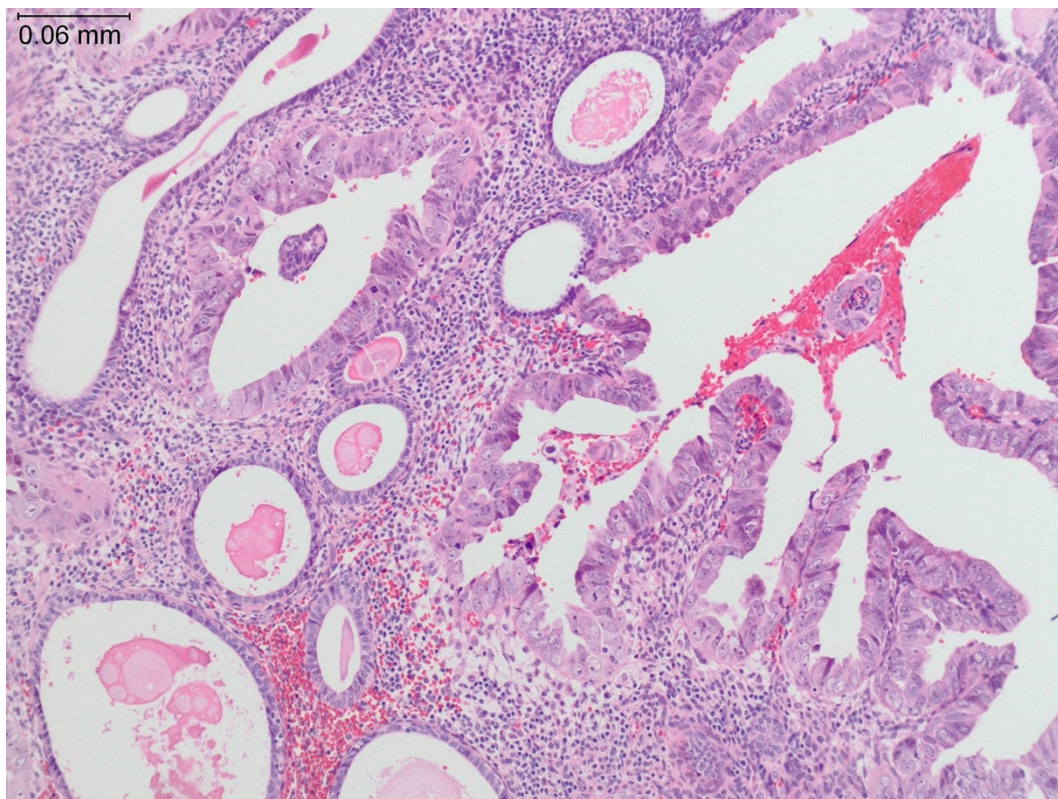

**Figure S2.** H&E of the tissue from the patient with a tumor containing a mutation in *MSH6*.

**Table S1.** Mutations identified in genes involved in the homologous recombination pathway in this sample of uterine serous tumors. Stratified by HRD score (>31, ≤31, and failed to calculate).

|           |        | TP53                                             |                                                  | BRCA1                 | BRCA2                                               | ATM                                  |                                                     | BARD1                               | BRIP1                   |
|-----------|--------|--------------------------------------------------|--------------------------------------------------|-----------------------|-----------------------------------------------------|--------------------------------------|-----------------------------------------------------|-------------------------------------|-------------------------|
| GIS score | ID     | Suspected Pathogenic                             | Unknown Pathogenicity                            | Unknown Pathogenicity | Unknown Pathogenicity                               | Deleterious or Suspected Deleterious | Unknown Pathogenicity                               | Unknown Pathogenicity               | Unknown Pathogenicity   |
| GIS ≥ 31  | 308165 | c.855_856delinsTT<br>(p.Glu285_Glu286delinsAsp*) |                                                  |                       |                                                     |                                      |                                                     |                                     |                         |
|           | 314624 | c.659A>G (p.Tyr220Cys)                           |                                                  |                       |                                                     |                                      |                                                     |                                     |                         |
|           | 308171 | c.568_572del<br>(p.Pro190Serfs*17)               |                                                  |                       |                                                     |                                      |                                                     |                                     |                         |
|           | 308161 | c.722C>G (p.Ser241Cys)                           |                                                  |                       |                                                     |                                      |                                                     |                                     |                         |
|           | 308167 | c.733G>T (p.Gly245Cys)<br>c.817C>T (p.Arg273Cys) |                                                  |                       |                                                     |                                      |                                                     |                                     |                         |
|           | 314617 | c.581T>G (p.Leu194Arg)                           |                                                  |                       |                                                     |                                      |                                                     | Uncharacterized Large Rearrangement |                         |
|           | 308153 | c.818G>T (p.Arg273Leu)                           |                                                  |                       |                                                     |                                      |                                                     |                                     |                         |
|           | 308172 | c.715A>G (p.Asn239Asp)                           |                                                  |                       |                                                     |                                      |                                                     |                                     |                         |
|           | 314625 | c.843C>A (p.Asp281Glu)                           |                                                  |                       |                                                     |                                      |                                                     |                                     |                         |
|           | 314632 |                                                  | c.763A>T (p.Ile255Phe)                           |                       |                                                     |                                      |                                                     |                                     |                         |
|           | 308160 |                                                  | c.451C>G (p.Pro151Ala)                           |                       |                                                     |                                      |                                                     |                                     |                         |
|           | 314619 | c.1025del<br>(p.Arg342Glnfs*3)                   |                                                  |                       |                                                     |                                      |                                                     |                                     |                         |
|           | 314639 | c.830G>T (p.Cys277Phe)                           |                                                  | dup exon 24           |                                                     |                                      |                                                     |                                     |                         |
|           | 308163 | c.742C>T (p.Arg248Trp)                           |                                                  |                       |                                                     |                                      |                                                     |                                     |                         |
|           | 308158 | c.532C>G (p.His178Asp)                           |                                                  |                       |                                                     |                                      |                                                     |                                     |                         |
|           | 308169 | c.524G>A (p.Arg175His)                           |                                                  |                       |                                                     |                                      |                                                     |                                     |                         |
|           | 314637 |                                                  | c.839G>C (p.Arg280Thr)                           |                       |                                                     |                                      |                                                     |                                     |                         |
|           | 314634 | c.637C>T (p.Arg213*)                             |                                                  |                       |                                                     |                                      |                                                     |                                     |                         |
|           | 314644 |                                                  |                                                  |                       |                                                     | c.6443_6452+19del                    | c.646G>T<br>(p.Ala216Ser)<br>c.968T>A (p.Ile323Lys) |                                     | c.1735C>T (p.Arg579Cys) |
|           | 314641 |                                                  |                                                  |                       |                                                     |                                      |                                                     |                                     |                         |
| GIS < 31  | 308164 | c.517G>A (p.Val173Met)                           |                                                  |                       |                                                     |                                      |                                                     |                                     |                         |
|           | 314621 | c.818G>A (p.Arg273His)                           |                                                  |                       |                                                     |                                      |                                                     |                                     |                         |
|           | 314631 | c.841G>T (p.Asp281Tyr)                           |                                                  |                       |                                                     |                                      | c.2927T>C (p.Val976Ala)                             |                                     |                         |
|           | 308159 |                                                  | c.737T>C (p.Met246Thr)                           |                       |                                                     |                                      |                                                     |                                     |                         |
|           | 308170 | c.371_372del<br>(p.Cys124Tyrfs*24)               |                                                  |                       | dup exons 1-2                                       |                                      |                                                     |                                     |                         |
|           | 314623 | c.659A>G (p.Tyr220Cys)                           |                                                  |                       |                                                     |                                      |                                                     |                                     |                         |
|           | 314628 | c.733G>A (p.Gly245Ser)                           |                                                  |                       |                                                     |                                      |                                                     |                                     |                         |
|           | 308173 | c.818G>A (p.Arg273His)<br>c.843C>A (p.Asp281Glu) |                                                  |                       |                                                     |                                      |                                                     |                                     |                         |
|           | 314640 | c.396G>C (p.Lys132Asn)<br>c.673-1G>T             |                                                  |                       |                                                     |                                      |                                                     |                                     |                         |
|           | 314618 | c.713G>T (p.Cys238Phe)                           |                                                  |                       |                                                     |                                      |                                                     |                                     |                         |
|           | 308156 | c.1034del<br>(p.Asn345Metfs*25)                  |                                                  |                       | c.2573G>C (p.Arg858Thr)<br>c.3097G>C (p.Asp1033His) |                                      |                                                     |                                     |                         |
|           | 308166 |                                                  | c.622_623delinsAT<br>(p.Asp208delinsIle)         |                       |                                                     |                                      |                                                     |                                     |                         |
|           | 314627 | c.637C>T (p.Arg213*)                             | c.322G>A (p.Gly108Ser)<br>c.472C>T (p.Arg158Cys) |                       |                                                     |                                      |                                                     |                                     |                         |
|           | 308155 | c.380C>T (p.Ser127Phe)                           |                                                  |                       |                                                     |                                      |                                                     |                                     |                         |
|           | 314620 | c.73del (p.Leu25Tyrfs*19)                        | c.773A>G (p.Glu258Gly)                           |                       |                                                     |                                      |                                                     |                                     |                         |
|           | 308168 | c.743G>A (p.Arg248Gln)<br>c.836G>A (p.Gly279Glu) |                                                  |                       |                                                     |                                      |                                                     |                                     |                         |
|           | 314633 | c.526T>C (p.Cys176Arg)                           |                                                  |                       |                                                     |                                      |                                                     |                                     |                         |
|           | 314638 |                                                  |                                                  |                       |                                                     | c.1564_1565del<br>(p.Glu522Ilefs*43) | c.8683G>C (p.Glu2895Gln)                            |                                     |                         |
|           | 308162 |                                                  |                                                  |                       |                                                     |                                      | c.6347+5G>A                                         |                                     |                         |
|           | 308174 |                                                  |                                                  |                       |                                                     |                                      |                                                     |                                     |                         |
| Failed    | 308154 | c.743G>A (p.Arg248Gln)                           |                                                  |                       |                                                     |                                      |                                                     |                                     |                         |
|           | 308157 | c.437G>A (p.Trp146*)                             |                                                  |                       |                                                     |                                      |                                                     |                                     |                         |
|           | 308176 |                                                  | c.503A>G (p.His168Arg)                           |                       |                                                     |                                      |                                                     |                                     |                         |
|           | 314616 | c.488A>G (p.Tyr163Cys)                           |                                                  |                       |                                                     |                                      |                                                     |                                     |                         |
|           | 314622 | c.722C>T (p.Ser241Phe)                           |                                                  |                       |                                                     |                                      |                                                     |                                     | c.778A>G (p.Thr260Ala)  |
|           | 314626 | c.818G>A (p.Arg273His)                           |                                                  |                       |                                                     |                                      |                                                     |                                     |                         |
|           | 314629 | c.742C>T (p.Arg248Trp)                           |                                                  |                       |                                                     |                                      |                                                     |                                     |                         |
|           | 314630 | c.467G>C (p.Arg156Pro)                           |                                                  |                       |                                                     |                                      |                                                     |                                     |                         |
|           | 314636 | c.830G>T (p.Cys277Phe)                           |                                                  |                       |                                                     |                                      |                                                     |                                     |                         |
|           | 314642 |                                                  | c.775G>T (p.Asp259Tyr)                           |                       |                                                     |                                      |                                                     |                                     |                         |
|           | 314635 |                                                  |                                                  |                       |                                                     |                                      |                                                     |                                     |                         |
|           | 314643 |                                                  |                                                  |                       |                                                     |                                      |                                                     |                                     |                         |

|           |        | CHEK1                  | CHEK2                   | FAM175A                | MRE11A                                    | NPN                     | PALB2                   | RAD51C                  | RAD51D              |
|-----------|--------|------------------------|-------------------------|------------------------|-------------------------------------------|-------------------------|-------------------------|-------------------------|---------------------|
| GIS score | ID     | Unknown                | Unknown                 | Unknown                | Unknown                                   | Unknown                 | Unknown                 | Unknown                 | Unknown             |
| GIS ≥ 31  | 308165 |                        |                         |                        |                                           |                         |                         |                         |                     |
|           | 314624 |                        |                         |                        |                                           |                         | c.2587-6T>G             |                         |                     |
|           | 308171 |                        |                         |                        | c.315-4dupT                               |                         |                         |                         |                     |
|           | 308161 |                        |                         |                        |                                           |                         |                         |                         |                     |
|           | 308167 |                        |                         |                        |                                           |                         |                         |                         |                     |
|           | 314617 |                        |                         |                        |                                           |                         |                         |                         |                     |
|           | 308153 |                        |                         |                        |                                           |                         |                         |                         |                     |
|           | 308172 |                        |                         |                        | c.1002C>G (p.Ser334Arg)                   |                         |                         |                         |                     |
|           | 314625 |                        |                         |                        | c.2092A>G<br>(p.Met698Val)<br>c.315-4dupT |                         |                         |                         |                     |
|           | 314632 |                        | c.1198G>T (p.Gly400Trp) |                        |                                           |                         |                         | c.1085C>T (p.Ser362Phe) |                     |
|           | 308160 |                        |                         |                        |                                           |                         |                         |                         |                     |
|           | 314619 |                        |                         |                        |                                           |                         |                         |                         |                     |
|           | 314639 |                        |                         |                        |                                           |                         |                         |                         |                     |
|           | 308163 |                        |                         |                        |                                           |                         |                         |                         |                     |
|           | 308158 |                        |                         |                        | Uncharacterized Large<br>Rearrangement    |                         |                         |                         |                     |
|           | 308169 |                        |                         |                        |                                           |                         |                         |                         |                     |
| GIS < 31  | 314637 |                        |                         |                        |                                           |                         |                         |                         |                     |
|           | 314634 |                        |                         |                        |                                           |                         |                         |                         |                     |
|           | 314644 |                        |                         |                        | c.37T>A (p.Phe131Ile)                     | c.1317A>G (p.Ile439Met) |                         |                         |                     |
|           | 314641 | c.467G>A (p.Arg156Gln) |                         |                        | c.121G>A (p.Asp41Asn)                     | c.1354A>C (p.Thr452Pro) |                         |                         |                     |
|           | 308164 |                        |                         |                        |                                           | c.1317A>G (p.Ile439Met) |                         |                         |                     |
|           | 314621 |                        |                         |                        | c.315-4dupT                               |                         |                         |                         |                     |
|           | 314631 |                        |                         |                        | c.2092A>G<br>(p.Met698Val)<br>c.315-4dupT |                         |                         |                         |                     |
|           | 308159 |                        |                         |                        | c.315-4dupT                               |                         |                         |                         |                     |
|           | 308170 |                        |                         |                        |                                           |                         |                         |                         |                     |
|           | 314623 |                        |                         |                        |                                           |                         |                         |                         |                     |
|           | 314628 |                        |                         | c.917T>C (p.Val306Ala) |                                           |                         |                         |                         |                     |
|           | 308173 |                        |                         |                        | c.315-4dupT                               |                         |                         |                         |                     |
|           | 314640 |                        |                         |                        |                                           |                         |                         |                         |                     |
|           | 314618 |                        |                         |                        |                                           |                         |                         |                         |                     |
|           | 308156 |                        |                         |                        |                                           |                         |                         |                         |                     |
|           | 308166 |                        |                         |                        |                                           |                         |                         |                         | c.26G>C (p.Cys9Ser) |
| Failed    | 314627 |                        |                         |                        |                                           |                         |                         |                         |                     |
|           | 308155 |                        |                         |                        |                                           |                         |                         |                         |                     |
|           | 314620 |                        |                         |                        | c.1783+5G>C<br>c.2092A>G<br>(p.Met698Val) |                         |                         |                         |                     |
|           | 308168 |                        |                         |                        |                                           |                         |                         |                         |                     |
|           | 314633 |                        |                         |                        |                                           |                         |                         |                         |                     |
|           | 314638 |                        |                         |                        |                                           |                         |                         |                         |                     |
|           | 308162 |                        |                         |                        |                                           |                         |                         |                         |                     |
|           | 308174 |                        |                         |                        |                                           | c.1845+3A>G             |                         |                         |                     |
|           | 308154 |                        |                         |                        |                                           |                         | c.1072C>T (p.Pro358Ser) |                         |                     |
|           | 308157 |                        |                         |                        |                                           |                         |                         |                         |                     |
|           | 308176 |                        |                         |                        |                                           |                         |                         |                         |                     |
|           | 314616 |                        |                         |                        |                                           |                         |                         |                         |                     |
|           | 314622 |                        |                         |                        |                                           |                         | c.2756T>C (p.Val919Ala) |                         |                     |
|           | 314626 |                        |                         |                        |                                           |                         |                         |                         |                     |
|           | 314629 |                        |                         |                        |                                           |                         |                         |                         |                     |
|           | 314630 |                        |                         |                        | c.315-4dupT                               |                         |                         |                         |                     |
|           | 314636 |                        |                         |                        |                                           |                         |                         |                         |                     |
|           | 314642 |                        |                         |                        |                                           |                         |                         |                         |                     |
|           | 314635 |                        |                         |                        |                                           |                         |                         |                         |                     |
|           | 314643 |                        |                         |                        |                                           |                         |                         |                         |                     |
